# Supplementary material for: Systematic Review of Pain Medicine Content, Teaching, and Assessment in Medical School Curricula Internationally
Source: PubMed Central journal article supplement — Pain Ther. 2018 Jul 30;7(2):139–61. doi: 10.1007/s40122-018-0103-z (PMC6251835; doi:10.1007/s40122-018-0103-z), 2018-07-30
Supplement: 40122_2018_103_MOESM1_ESM.pdf [file 40122_2018_103_MOESM1_ESM.pdf]

## PubMed MeSH Terms

(((((("pain"[MeSH Terms] OR "pain"[All Fields]) AND ("education"[Subheading] OR "education"[All Fields] OR "educational status"[MeSH Terms] OR ("educational"[All Fields] AND "status"[All Fields]) OR "educational status"[All Fields] OR "education"[All Fields] OR "education"[MeSH Terms])) AND ("students, medical"[MeSH Terms] OR ("students"[All Fields] AND "medical"[All Fields]) OR "medical students"[All Fields] OR ("medical"[All Fields] AND "student"[All Fields]) OR "medical student"[All Fields])) AND ("education"[Subheading] OR "education"[All Fields] OR "curriculum"[All Fields] OR "curriculum"[MeSH Terms]) AND ("1987/01/01"[PDAT] : "2018/05/31"[PDAT])) OR (((("pain management"[MeSH Terms] OR ("pain"[All Fields] AND "management"[All Fields]) OR "pain management"[All Fields]) AND ("education"[Subheading] OR "education"[All Fields] OR "educational status"[MeSH Terms] OR ("educational"[All Fields] AND "status"[All Fields]) OR "educational status"[All Fields] OR "education"[All Fields] OR "education"[MeSH Terms])) AND ("education"[Subheading] OR "education"[All Fields] OR "curriculum"[All Fields] OR "curriculum"[MeSH Terms])) AND ("universities"[MeSH Terms] OR "universities"[All Fields] OR "university"[All Fields])) AND (("health"[MeSH Terms] OR "health"[All Fields]) AND ("science"[MeSH Terms] OR "science"[All Fields])) AND ("1987/01/01"[PDAT] : "2018/05/31"[PDAT]))) OR (((("pain"[MeSH Terms] OR "pain"[All Fields]) AND ("education, medical"[MeSH Terms] OR ("education"[All Fields] AND "medical"[All Fields]) OR "medical education"[All Fields] OR ("medical"[All Fields] AND "education"[All Fields]))) AND undergraduate[All Fields]) AND ("education"[Subheading] OR "education"[All Fields] OR "curriculum"[All Fields] OR "curriculum"[MeSH Terms]) AND ("1987/01/01"[PDAT] : "2018/05/31"[PDAT])) AND English[lang]
